# Supplementary material for: Mucopolysaccharidosis-Plus Syndrome: Report on a Polish Patient with a Novel VPS33A Variant with Comparison with Other Described Patients
Source: MDPI journal article supplement (doi:10.3390/ijms231911424), 2022-09-28
Supplement: s1 [file s1]

## Supplementary Material

### MS instrument parameters for panel 1.

|                                     |        |
|-------------------------------------|--------|
| Curtain Gas (CUR)                   | 30 L/h |
| Collision Gas (CAD)                 | Medium |
| Ion Spray Voltage                   | 5500 V |
| Temperature (TEM)                   | 480°C  |
| Ion Source Gas 1 (GS1)              | 50 L/h |
| Ion Source Gas 1 (GS2)              | 65 L/h |
| Dwell time                          | 18 ms  |
| Declustering potential (DP)         | 40 V   |
| Entrance Potential (EP)             | 10 V   |
| Collision Cell Exit potential (CXP) | 10 V   |

### MRM parameters for panel 1.

|         | Precursor ion<br>( <i>m/z</i> ) | Product ion<br>( <i>m/z</i> ) | CE<br>(V) |
|---------|---------------------------------|-------------------------------|-----------|
| GALC-P  | 412.20                          | 264.20                        | 30        |
| GALC-IS | 417.20                          | 264.20                        | 30        |
| GAA-P   | 498.20                          | 398.20                        | 32        |
| GAA-IS  | 503.20                          | 403.20                        | 32        |
| GLA-P   | 484.20                          | 384.20                        | 32        |
| GLA-IS  | 489.20                          | 389.20                        | 32        |
| ABG-P   | 384.20                          | 264.20                        | 28        |
| ABG-IS  | 391.20                          | 271.20                        | 28        |
| ASM-P   | 398.20                          | 264.20                        | 30        |
| ASM-IS  | 405.20                          | 264.20                        | 30        |
| IDUA-P  | 426.20                          | 317.20                        | 25        |
| IDUA-IS | 431.20                          | 322.20                        | 25        |

P, product of enzyme reaction

IS, internal standard.

DP, declustering potential

CE, collision energy

### HPLC method for panel 1.

|                         |                                                                                                           |
|-------------------------|-----------------------------------------------------------------------------------------------------------|
| Column                  | XBridge BEH C18 (Waters, USA).<br>Particle diameter: 3.5 µm<br>Internal diameter: 2.1 mm<br>Length: 50 mm |
| Column temperature      | 60°C                                                                                                      |
| Wash solvent            | 80% Methanol in water                                                                                     |
| Mobile phase A          | 0.2% formic acid in water                                                                                 |
| Mobile phase B          | 0.2% formic acid in acetonitrile                                                                          |
| Gradient (% B)          | 0 - 0.50 min: 10% B – 98% B<br>0.50 - 2.00 min: 98% B<br>2.00 – 3.00 min: 10% B                           |
| Flow rate               | 0.4 mL/min                                                                                                |
| Injection volume        | 10 µL                                                                                                     |
| Autosampler temperature | 15°C                                                                                                      |

### MS instrument parameters for panel 2.

|                         |        |
|-------------------------|--------|
| Curtain Gas (CUR)       | 20 L/h |
| Collision Gas (CAD)     | Medium |
| Ion Spray Voltage       | 5500 V |
| Temperature (TEM)       | 600°C  |
| Ion Source Gas 1 (GS1)  | 50 L/h |
| Ion Source Gas 1 (GS2)  | 65 L/h |
| Dwell time              | 20 ms  |
| Entrance Potential (EP) | 10 V   |

**MRM parameters for panel 2.**

|          | Precursor ion<br>( <i>m/z</i> ) | Product ion<br>( <i>m/z</i> ) | DP<br>(V) | CE<br>(V) |
|----------|---------------------------------|-------------------------------|-----------|-----------|
| NAGLU-P  | 420.30                          | 311.30                        | 65        | 21        |
| NAGLU-IS | 423.30                          | 314.30                        | 65        | 21        |
| GALNS-P  | 685.40                          | 373.30                        | 80        | 35        |
| GALNS-IS | 690.40                          | 378.30                        | 80        | 35        |
| ARSB-P   | 657.40                          | 345.20                        | 80        | 33        |
| ARSB-IS  | 662.40                          | 350.30                        | 80        | 33        |
| GLB1-P   | 436.30                          | 336.30                        | 50        | 21        |
| GLB1-IS  | 439.30                          | 339.30                        | 50        | 21        |
| GUSB-P   | 434.30                          | 325.30                        | 80        | 34        |
| GUSB-IS  | 439.30                          | 330.30                        | 80        | 34        |
| I2S-P    | 644.40                          | 359.30                        | 80        | 30        |
| I2S-IS   | 649.30                          | 364.30                        | 80        | 30        |
| TPP1-P   | 350.30                          | 250.30                        | 36        | 20        |
| TPP1-IS  | 359.30                          | 251.30                        | 36        | 20        |

P, product of enzyme reaction

IS, internal standard.

DP, declustering potential

CE, collision energy

**HPLC method for panel 2.**

|                         |                                                                                                                |
|-------------------------|----------------------------------------------------------------------------------------------------------------|
| Column                  | <b>Fusion-RP (Phenomenex, USA).</b><br>Particle diameter: 4.0 µm<br>Internal diameter: 2.1 mm<br>Length: 50 mm |
| Column temperature      | 60°C                                                                                                           |
| Wash solvent            | 80% Methanol in water                                                                                          |
| Mobile phase A          | 0.2% formic acid in water                                                                                      |
| Mobile phase B          | 0.2% formic acid in acetonitrile                                                                               |
| Gradient (% B)          | 0 – 2.00 min: 10% B – 80% B<br>2.00 - 2.50 min: 80% B<br>2.50 – 3.50 min: 10% B                                |
| Flow rate               | 0.5 mL/min                                                                                                     |
| Injection volume        | 5 µL                                                                                                           |
| Autosampler temperature | 15°C                                                                                                           |
